# Supplementary material for: Superplastic nanoscale pore shaping by ion irradiation
Source: PubMed Central journal article supplement (PMC5827561; doi:10.1038/s41467-018-03316-7), 2018-02-26
Supplement: 41467_2018_3316_MOESM3_ESM.pdf [file 41467_2018_3316_MOESM3_ESM.pdf]

## **Description of Additional Supplementary Files**

File Name: Supplementary Movie 1

Description: AAO pores shrinkage at low-flux irradiation - 25keV He+.
